# Supplementary material for: Phosphorus and carbon in soil particle size fractions – A global synthesis
Source: Copernicus journal article supplement (doi:10.5194/bg-2018-404), 2018-09-21
Supplement: Supplementary file 1 [file bg-2018-404-supplement.zip]

## **Supplement 1** List of all publications considered in the meta-analysis

Agbenin, J. O., and Tiessen, H.: Phosphorus forms in particle-size fractions of a toposequence from Northeast Brazil. *Soil Sci Soc Am J*, 59(6), 1687-1693, 1995.

Guzel, N., and Ibrikci, H.: Distribution and fractionation of soil phosphorus in particle-size separates in soils of Western Turkey. *Commun Soil Sci Plan*, 25(17-18), 2945-2958, 1994.

Lobe, I., Amelung, W., and Du Preez, C. C.: Losses of carbon and nitrogen with prolonged arable cropping from sandy soils of the South African Highveld. *Eur J Soil Sci*, 52(1), 93-101, 2001.

Makarov, M. I., Haumaier, L., Zech, W., and Malysheva, T. I.: Organic phosphorus compounds in particle-size fractions of mountain soils in the northwestern Caucasus. *Geoderma*, 118(1-2), 101-114, 2004.

Rubæk, G. H., Guggenberger, G., Zech, W., and Christensen, B. T.: Organic phosphorus in soil size separates characterized by phosphorus-31 nuclear magnetic resonance and resin extraction. *Soil Sci Soc Am J*, 63(5), 1123-1132, 1999.

Solomon, D., and Lehman, N.: Loss of phosphorus from soil in semi-arid northern Tanzania as a result of cropping: evidence from sequential extraction and <sup>31</sup>P-NMR spectroscopy. *Eur J Soil Sci*, 51(4), 699-708, 2000.

Solomon, D., Lehmann, J., and Zech, W.: Land use effects on soil organic matter properties of chromic luvisols in semi-arid northern Tanzania: carbon, nitrogen, lignin and carbohydrates. *Agric Ecosyst Environ*, 78(3), 203-213, 2000.

Solomon, D., Lehmann, J., Mamo, T., Fritzsche, F., and Zech, W.: Phosphorus forms and dynamics as influenced by land use changes in the sub-humid Ethiopian highlands. *Geoderma*, 105(1-2), 21-48, 2002.

Syers, J. K., Shah, R., and Walker, T. W.: Fractionation of phosphorus in two alluvial soils and particle-size separates. *Soil Science*, 108(4), 283-289, 1969.

Tiessen, H. J. W. B., Stewart, J. W. B., and Moir, J. O.: Changes in organic and inorganic phosphorus composition of two grassland soils and their particle size fractions during 60–90 years of cultivation. *J Soil Sci*, 34(4), 815-823, 1983.

Uriyo, A. P., Singh, B. R., and Kesseba, A.: Forms of Phosphorus in the Separates of Three Tanzanian Soils Belonging to Mollisol, Alfisol and Oxisol Orders. *E Afr Agr Forestry J*, 43(2), 120-123, 1977.

Von Sperber, C., Stallforth, R., Du Preez, C., and Amelung, W.: Changes in soil phosphorus pools during prolonged arable cropping in semiarid grasslands. *Eur J Soil Sci*, 68(4), 462-471, 2017.

Williams, E. G., and Saunders, W. M. H.: Distribution of phosphorus in profiles and particle-size fractions of some Scottish soils. *Eur J Soil Sci*, 7(1), 90-109, 1956.

# Supplement 3 Table S1 and Table S2 Regression models

**Table S1** Intercepts and slopes of (multiple) linear regression models calculated for total organic C (TOC), total organic P (TOP), total inorganic P (TIP), and organic carbon (OC), organic phosphorus (OP) and inorganic phosphorus (IP) concentrations of the three particle size fractions as a function of latitude (Lat), mean annual temperature (MAT) and mean annual precipitation (MAP), either alone or in combination. Note that intercepts and slopes are only given for the significant regressions (>0.05). No star stands for >0.05, \* stands for 0.05, \*\* stands for 0.01, and \*\*\* stands for 0.001.

| Model         | Parameter | TOC       | TOP        | TIP       | TP      | OC of sand size fraction | OC of silt size fraction | OC of clay size fraction | OP of sand size fraction | OP of silt size fraction | OP of clay size fraction | IP of sand size fraction | IP of silt size fraction | IP of clay size fraction | P of clay size fraction |
|---------------|-----------|-----------|------------|-----------|---------|--------------------------|--------------------------|--------------------------|--------------------------|--------------------------|--------------------------|--------------------------|--------------------------|--------------------------|-------------------------|
| Lat           | Intercept |           | 77.45      |           |         |                          |                          | 26.70**                  |                          | 121.07                   | 353.92**                 |                          | 991.45***                | 2234.86***               |                         |
|               | Lat       |           | 6.43**     |           |         |                          |                          | 0.80**                   |                          | 6.79**                   | 14.33***                 |                          | -12.98*                  | -30.53*                  |                         |
| MAT           | Intercept | 58.58*    | 703.00***  |           |         | 31.91***                 | 70.98***                 | 88.75***                 | 228.52***                | 683.80***                | 1385.28***               | -68.71                   | 19.35                    | -160.43                  |                         |
|               | MAT       | -2.34***  | -34.06***  |           |         | -1.24*                   | -2.32***                 | -3.14***                 | -10.42***                | -26.69***                | -44.38***                | 30.55*                   | 43.68**                  | 111.38***                |                         |
| MAP           | Intercept | -13.56*** | 84.32      | 113.13*   | 362.96  | -15.35**                 | 4.44                     | 21.74**                  |                          | 75.08                    | 354.70**                 |                          |                          |                          |                         |
|               | MAP       | 0.05***   | 0.25**     | 0.23***   | 0.51*   | 0.04***                  | 0.05***                  | 0.04***                  |                          | 0.30***                  | 0.52***                  |                          |                          |                          |                         |
| Lat +MAT      | Intercept | 165.33*** | 1420.26*** | 806.77*** |         | 128.51***                | 212.76***                | 181.44***                | 605.88***                | 1276.34***               | 1707.14***               |                          | -387.88                  | -1699.86                 | 46.45                   |
|               | Lat       | -1.94***  | -12.51***  | -8.69**   |         | -1.77***                 | -2.57***                 | -1.68***                 | -6.50***                 | -10.14**                 | -5.51                    |                          | 6.99                     | 26.42                    | 22.00                   |
|               | MAT       | -6.04***  | -59.24***  | -18.07**  |         | -4.78***                 | -7.53***                 | -6.55***                 | -23.69***                | -47.57***                | -55.72***                |                          | 57.93*                   | 165.26**                 | 100.33                  |
| MAT +MAP      | Intercept | 16.35*    | 517.37***  | 97.06     | -561.68 | -1.92                    | 31.18**                  | 59.72***                 | 168.46**                 | 440.43***                | 959.60***                | -233.09                  | -245.28                  | -970.51                  | 142.34                  |
|               | MAT       | -2.13***  | -32.49***  | 1.20      | 47.43*  | -1.05**                  | -2.09***                 | -2.97***                 | -9.91***                 | -24.66***                | -40.82***                | 32.44*                   | 46.71**                  | 120.67***                | 69.07*                  |
|               | MAP       | 0.05***   | 0.20***    | 0.23***   | 0.81**  | 0.04***                  | 0.048***                 | 0.03***                  | 0.06                     | 0.25***                  | 0.44***                  | 0.16                     | 0.26                     | 0.81                     | 1.18*                   |
| Lat +MAT +MAP | Intercept | 84.14***  | 1267.74*** | 639.56*** | 493.20  | 47.99                    | 137.50***                | 121.64***                | 551.13***                | 1069.17***               | 1357.03***               | -402.63                  | -590.98                  | -2315.84                 | -874.41                 |
|               | Lat       | 1.09***   | -13.46***  | -9.73***  | 17.95   | -0.81*                   | -1.71**                  | -0.99**                  | -6.74***                 | -10.99***                | -6.95                    | 3.01                     | 6.08                     | 23.67                    | 17.89                   |
|               | MAT       | -4.24***  | -59.39***  | -18.25**  | 9.82    | 2.70**                   | -5.62***                 | -5.03***                 | -23.61***                | -47.17***                | -55.06***                | 38.47                    | 59.02                    | 168.55**                 | 105.26                  |
|               | MAP       | 0.042***  | 0.22***    | 0.25***   | 0.81**  | 0.03***                  | 0.03***                  | 0.05***                  | 0.07                     | 0.26***                  | 0.45***                  | 0.16                     | 0.26                     | 0.78                     | 1.16*                   |

1 **Table S2** Intercepts and slopes of (multiple) linear regression models of the molar ratio of total organic C-to-total organic P of the bulk soil  
2 (TOC:TOP), the molar ratio of total inorganic P-to-total organic P of the bulk soil (TIP:TOP), and the molar ratio of inorganic P-to-organic P (IO:OP)  
3 and organic C-to-organic P (IP:OP) of the particle size fractions as a function of latitude (Lat), mean annual temperature (MAT) and mean annual  
4 precipitation (MAP). Note that intercepts and slopes are only given for the significant regressions (>0.05). No star stands for >0.05, \* stands for 0.05,  
5 \*\* stands for 0.01, and \*\*\* stands for 0.001.

| Model | Parameter | TOC:TOP<br>ratio | TIP:TOP<br>ratio | TOC:TP<br>ratio | OC:OP ratio of<br>sand size<br>fraction | OC:OP ratio<br>of silt size<br>fraction | OC:OP ratio<br>of clay size<br>fraction | IP:OP ratio<br>of sand size<br>fraction | IP:OP ratio<br>of silt size<br>fraction | IP:OP ratio<br>of clay size<br>fraction |
|-------|-----------|------------------|------------------|-----------------|-----------------------------------------|-----------------------------------------|-----------------------------------------|-----------------------------------------|-----------------------------------------|-----------------------------------------|
| Lat   | Intercept | 339.42***        | 2.98***          | 0.07***         | 2048.12***                              | 750.23***                               | 318.05***                               | 23.48***                                | 7.02***                                 | 4.76***                                 |
|       | Lat       | -2.98***         | 0.04***          | -0.00***        | -40.76***                               | -10.43***                               | -3.66***                                | -0.40*                                  | -0.13***                                | -0.09***                                |
| MAT   | Intercept | 200.23***        | 0.20             | 0.03***         | 91.59                                   | 186.60***                               | 132.10***                               |                                         | -2.01                                   | -1.19***                                |
|       | MAT       | 3.95*            | 0.12***          | 0.00            | 60.10*                                  | 20.13***                                | 6.06***                                 |                                         | 0.39***                                 | 0.25***                                 |
| MAP   | Intercept | 171.42***        |                  | 0.03**          | -864.80*                                |                                         |                                         |                                         |                                         |                                         |
|       | MAP       | 0.11**           |                  | 0.00*           | 2.04***                                 |                                         |                                         |                                         |                                         |                                         |
| Lat   | Intercept | 460.34***        | 1.00             | 0.11***         | 4719.68***                              | 853.46***                               | 456.45***                               | -26.13                                  | -3.52                                   | -1.33                                   |
| +MAT  | Lat       | -4.91**          | -0.01            | -0.00*          | -84.66***                               | -12.09***                               | -5.88***                                | 0.32                                    | 0.03                                    | 0.00                                    |
|       | MAT       | -5.02            | 0.09*            | -0.00***        | -114.68**                               | -4.37                                   | -5.85                                   | 2.12**                                  | 0.44**                                  | 0.26***                                 |
| MAT   | Intercept | 126.53***        | 0.02             | 0.05***         | -1628.16***                             | 47.41*                                  | 0.01***                                 | -9.86                                   | -2.16                                   | -1.64                                   |
| +MAP  | MAT       | 3.72*            | 0.11***          | -0.00**         | 64.81**                                 | 20.36***                                | 6.10***                                 | 1.48***                                 | 0.39***                                 | 0.26***                                 |
|       | MAP       | 0.11**           | 0.00             | -0.00           | 2.08***                                 | 0.05                                    | 0.00                                    | 0.00                                    | 0.00                                    | 0.00                                    |
| Lat   | Intercept | 313.17**         | 1.01             | 0.10***         | 520.08                                  | 1020.13***                              | 581.66***                               | -27.53                                  | -3.60                                   | -1.69                                   |
| +MAT  | Lat       | -3.01            | 0.01             | 0.00            | -34.95                                  | -14.01***                               | -7.32***                                | 0.31                                    | 0.03                                    | 0.00                                    |
| +MAP  | MAT       | -1.70            | 0.08*            | 0.00***         | -7.99                                   | -8.60                                   | -9.04*                                  | 2.12**                                  | 0.44**                                  | 0.26***                                 |
|       | MAP       | 0.07             | 0.00             | 0.00            | 1.79***                                 | -0.07                                   | -0.06*                                  | 0.00                                    | 0.00                                    | 0.00                                    |
